# Supplementary material for: Whole Brain Expression of Bipolar Disorder Associated Genes: Structural and Genetic Analyses
Source: PLoS One. 2014 Jun 18;9(6):e100204. doi: 10.1371/journal.pone.0100204 (PMC4062532; doi:10.1371/journal.pone.0100204)
Supplement: Table S1 — BD associated index genes and corresponding gene sets. (XLS) [file pone.0100204.s001.xls]

## Sheet: Sheet1
	Cluster 1											Cluster 2											Cluster 3
Index	ATP6V1G3	GATA5	GPR81	NGF	NPAS3	PAX1	SPERT	TNR	ZMIZ1		Index	ADCY2	CACNB3	DLG2	KDM5B	KIF1A	MAPK10	RIMBP2	UBE2E3	UBR1		Index	ANK3	FAM155A	SIPA1L2	STK39
	OR2T4	KRTAP13-3	OR1L1	TSPAN10	GLTPD1	SHROOM1	OR5M1	XYLT1	CDKN2B			SLC26A4	CELF4	ARHGEF9	EXOC6	MAPT	RAB6B	SCN3B	APBB1	CCT2			DNM3	TTC39C	RGS6	C16orf61
	TGM4	GYPA	OR10X1	OR11H12	MCAT	GFRA4	SLC2A7	PTPRS	MAGEA9			NPPA	GPM6A	LMBRD2	ZNF148	ATP13A2	AACS	LY6H	POLR2B	DNAJB9			B3GALNT2	PPP2R5E	SLC17A6	C20orf30
	LCN10	GSDMC	MC5R	CEACAM19	LCE1D	TDRD10	NOX1	PTK2	MIA2			NEUROD6	SLC8A2	GRIA3	BAI3	SBF1	PI4KA	ENC1	POLR3K	MSH2			EIF1AX	GLS	KCNH5	TNFRSF21
	SLC2A7	SLC2A7	FAM46D	ASTL	AJAP1	FGF3	GYPA	TNR	CTF1			ABCC12	STX1A	FAM171B	MBTPS1	PPP1R12C	KIFAP3	SUB1	NDUFS2	G3BP2			CLASP2	FBXW7	KMO	AGTPBP1
	IL22	GPR112	NOX1	ATAD3C	ADM2	HNRNPU	SLCO1B3	NAV1	FAM83A			LOC646627	NOL4	MTA3	MAPK14	TCF25	C11orf49	PGM2L1	SARS	COL4A3BP			EFHA2	PNMA3	SCN1A	DHCR24
	OR5M1	LDHAL6B	AGXT	CYP4A11	ANXA8L2	CCDC120	AGXT	PCDH15	TUBB1			LYZL4	TTC9B	GNPTAB	ZFAND5	FBXW5	TUBA4A	VSTM2L	PSMA1	RG9MTD1			MTMR4	ELAVL4	PRICKLE1	MTMR2
	DGAT2L6	NOX1	OR5D16	KIAA0913	CCDC85B	SLC16A5	OR1L1	DMD	MAGEA2			ANXA8	GPRIN1	GMFB	VPS26B	BAP1	PLD3	DCLK1	PSMG1	MAEA			COPA	NRXN1	KCNC2	ENDOD1
	VHLL	MMP27	TBX5	SMARCA2	UTF1	NFYC	TMPRSS11B	SIRPA	MAGEA8			HSPB3	ENC1	VSTM2L	HECTD2	PPP2R4	SYP	MKL2	XRCC6	KLHL12			RPS6KB1	PPM1E	CELF2	RTCD1
	NOX1	PSTPIP2	HSFY2	ATN1	BCAM	SH3BP2	POF1B	GMFB	GNAO1			MPPED1	HSD11B1L	AJAP1	C1orf173	PLD3	PRKAR1B	RAPH1	HAGH	CSNK1G3			RABGEF1	SMAP1	OPN3	COPS5
	NFE2	C14orf166B	LUM	DEFB132	SP7	FAM47C	CNGA1	ANXA8L2	SERPINA3			FEZF2	FAM131A	SUB1	KIAA1468	FARSA	KIAA1045	TMEM130	PDCD6	RAN			SLC25A32	MARK1	MCF2	MRPL48
	POF1B	DMRTB1	SSX1	DMRTA2	AMN	KCNK15	OR10K1	CLIP3	NLRP12			PKD2L1	DPF1	AK5	CEP68	APBB1	VPS35	CACNG3	MAGEF1	ZYG11B			RALGAPA1	NAP1L2	FAM3C	FAM134B
	TMPRSS11B	SLAMF6	LDHAL6B	TRIM29	CACNA1I	NCK2	TCL6	ADRBK2	C9orf131			MEIS3	SCN2A	GRIA1	UBQLN2	ACTR1A	CA1	RAB27B	C19orf62	YTHDF2			RUFY2	SNAP91	CAMK2G	ARL6IP5
	SEMG1	OR5M1	MYL1	NLRC3	RFX1	HIP1	OR52A4	SEPT3	OR9Q1			OR14I1	SCN9A	ZNF643	ABI2	MAPK8IP2	YWHAB	SVOP	SLBP	ARMCX1			DMXL1	LRFN2	FAM19A2	RAP1GDS1
	MUC2	OR5H6	DDX53	RANBP17	RCOR2	GSN	ACOXL	ASTN1	ALX1			C6orf105	SEPT5	GABRA2	C11orf58	PIN1	AP2S1	PCDH19	PSMC6	TAF9			SPHAR	LRP8	FGF12	RAB33A
	OR5K2	LEFTY2	DGAT2L6	EPM2A	PARP10	ZNF775	OR8D4	IRS2	DPPA2			OVOL2	C9orf4	LPPR4	SSX2IP	CAPNS1	ALDOA	MBOAT7	MADD	PAFAH1B1			FASTKD5	MAP2K4	BCL2L2	HTATIP2
	OR51F2	MIOX	OR5M1	RIN1	ALDOA	PIGC	MC5R	NRXN2	YIF1B			HRH1	BAI2	GNA11	RTF1	DCTN1	DUSP3	KCNT2	C1orf128	CCT5			ARIH2	MAST1	EPN3	FAM49B
	KRT32	ST8SIA4	GP2	EVPL	ADAMTS7	GSTCD	CCT8L2	FAM20B	TXNDC2			RXFP1	ABR	GABRA5	FAM117B	ABCA3	CLSTN1	SYT17	BRF2	ZNF25			DDHD2	CDK14	CHML	MRPS22
	GTSF1L	TAS2R40	HIST1H2BA	TFF1	APEX2	SPINK7	ARR3	ZNF71	PTK6			MEF2C	SCN3B	LARGE	RNF145	ATP6AP1	ATP6V0C	CCK	MAGED1	YIPF5			ELAVL3	CHD5	PDE4A	VDAC2
	CCT8L2	OR6T1	PKHD1	TNRC18	BASP1	ICOSLG	DGAT2L6	WDR1	LTB4R2			KCNV1	LINGO1	GRIA2	ZNF398	COBRA1	NME1	SEMA4F	BSCL2	GOPC			TTC37	NAP1L3	EIF5A2	BCAT1
	CD200R1L	LST-3TM12	OR4C15	RBMS2	HOXA3	PRHOXNB	CD1D	MAPK8IP1	KRT77			DLX1	NPDC1	CHSY3	ZNF26	C16orf5	MPND	BASP1	NME1	ANKRD46			RICTOR	CCDC64	OSBPL5	C4orf27
	SLCO1B3	SDR9C7	F11	PTGER2	ARTN	IL27	OR10X1	OPHN1	LILRA2			TBR1	SVOP	TMEM181	ZDBF2	SGSM3	CAP2	DPF1	PIH1D1	IARS			PPP3CC	GABRG2	RFPL3	TMEM59
	GYPA	AGXT	SPINK14	RFNG	ZNF771	TRYX3	MUC17	ENAH	SIX5			GDA	RUNDC3A	IDS	PAIP1	ATP6V0E2	TUBB3	HMGCR	ATP6V0D1	PSMA1			RINT1	KCNJ6	EFR3A	RWDD1
	OR1L1	TCL6	C6orf223	BCAM	OGDH	ZDHHC8	FAM46D	ZNF436	OR2G2			MCHR2	DMRTC1	PPP2R5C	CLIP1	COASY	PIN1	GABRA3	MMADHC	PWP1			FGF9	ADRBK2	SLC45A4	UBE2G1
	IFNK	ALOXE3	HOXA11	TLX2	KCNH3	OR10C1	TGM4	TNPO2	PLA2G2F			SATB2	CACNA1B	MMD	USP15	HAGH	TAGLN3	SLC30A3	C12orf44	RAD23B			BLMH	UBE2O	P2RX6	BACE1
